# Supplementary material for: Simple rules and the emergence of complexity in surface chirality
Source: Royal Society of Chemistry journal article supplement (doi:10.1039/c6cc06523f), 2016-01-01
Supplement: c6cc06523f1.pdf [file c6cc06523f1.pdf]

## **Supplementary Information**

**‘Simple Rules and the Emergence of Complexity in surface Chirality’**

*by Matthew Forster and Rasmita Raval*

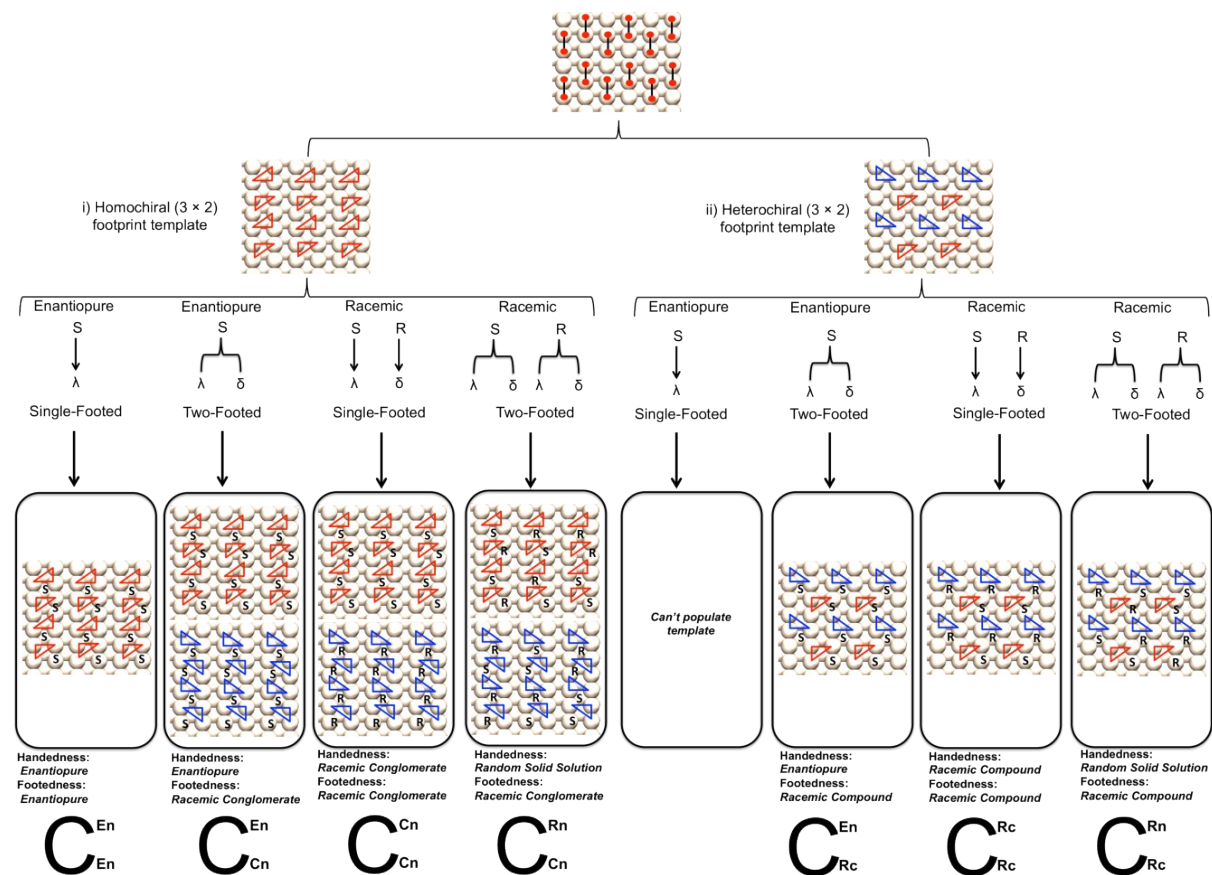

**Figure S1** Surface chirality generators for the (i) homochiral ( $C_2 \times E$ ) and (ii) heterochiral ( $S_2 \times E$ ) footprint templates within a ( $3 \times 2$ ) packing. The chiral outputs arising from the enantiopure and racemic adsorption of both single-footed and two-footed molecules are derived for each template and are labelled in terms of their overall surface chirality,  $C_F^H$ .

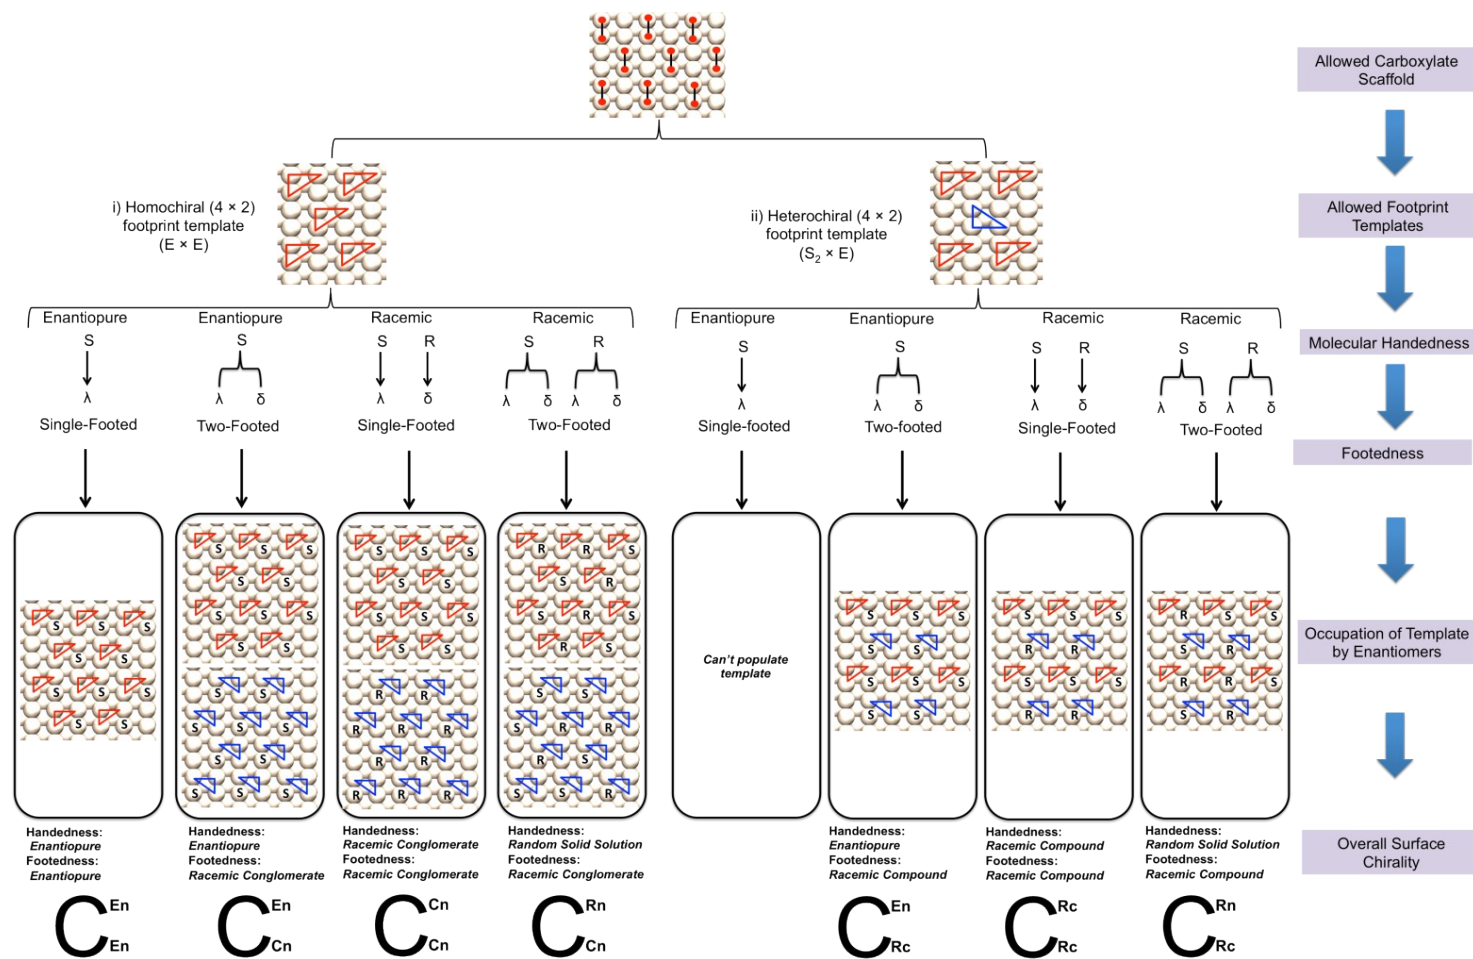

**Figure S2** Surface chirality generators for the (i) homochiral ( $E \times E$ ) and (ii) heterochiral ( $S_2 \times E$ ) footprint templates within a ( $4 \times 2$ ) packing. The chiral outputs arising from the enantiopure and racemic adsorption of both single-footed and two-footed molecules are derived for each template and are labelled in terms of their overall surface chirality,  $C_F^H$ .

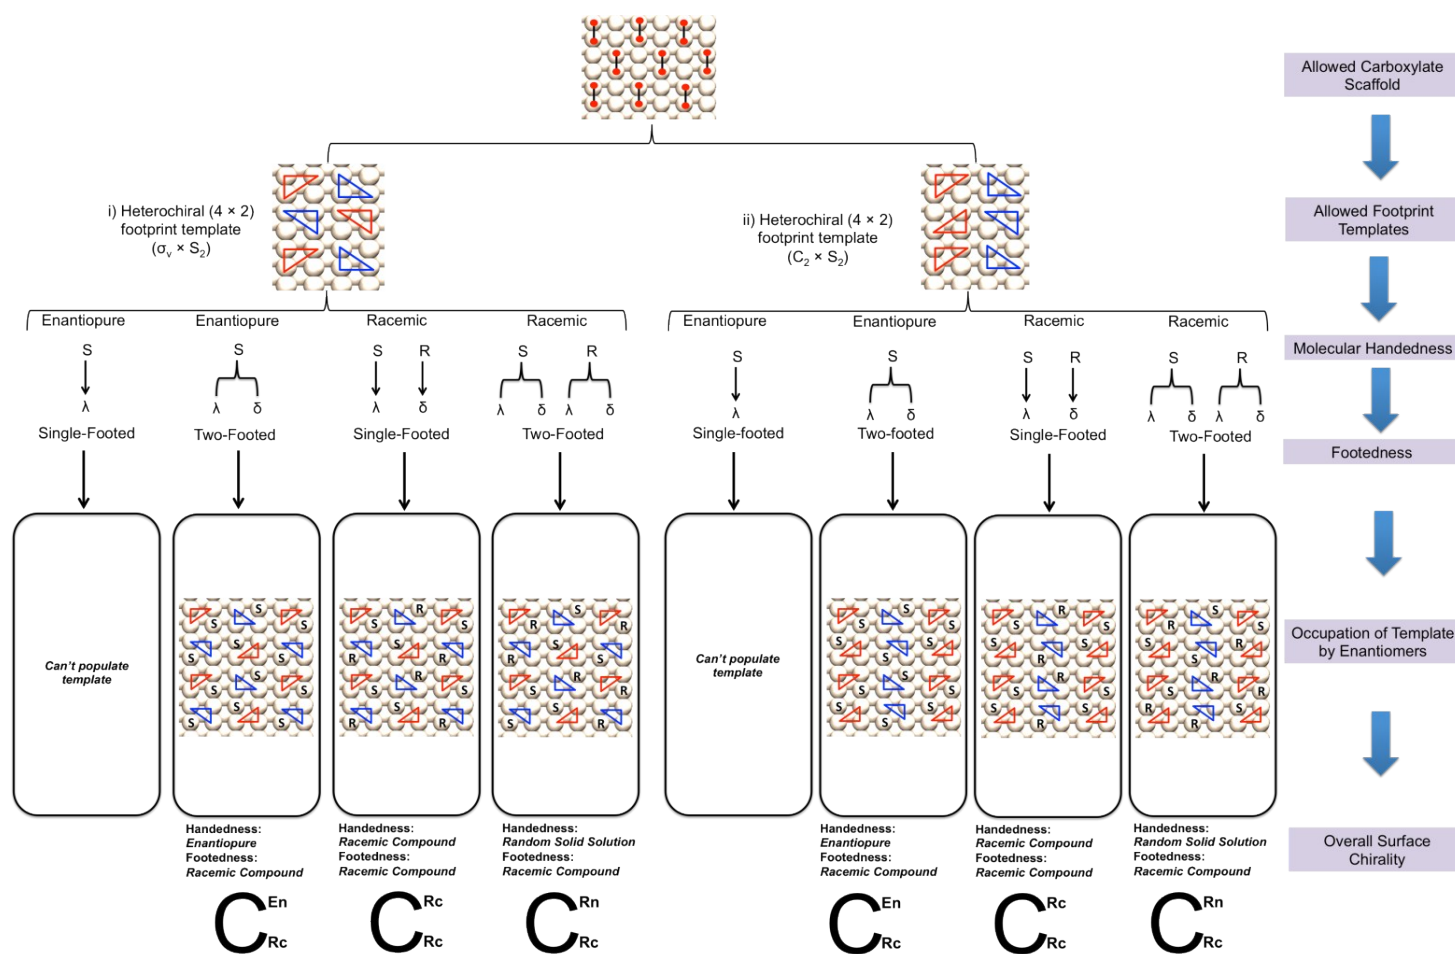

**Figure S3** Surface chirality generators for the (i) heterochiral ( $\sigma_v \times S_2$ ) and (ii) heterochiral ( $C_2 \times S_2$ ) footprint templates within a  $(4 \times 2)$  packing. The chiral outputs arising from the enantiopure and racemic adsorption of both single-footed and two-footed molecules are derived for each template and are labelled in terms of their overall surface chirality,  $C_F^H$ .

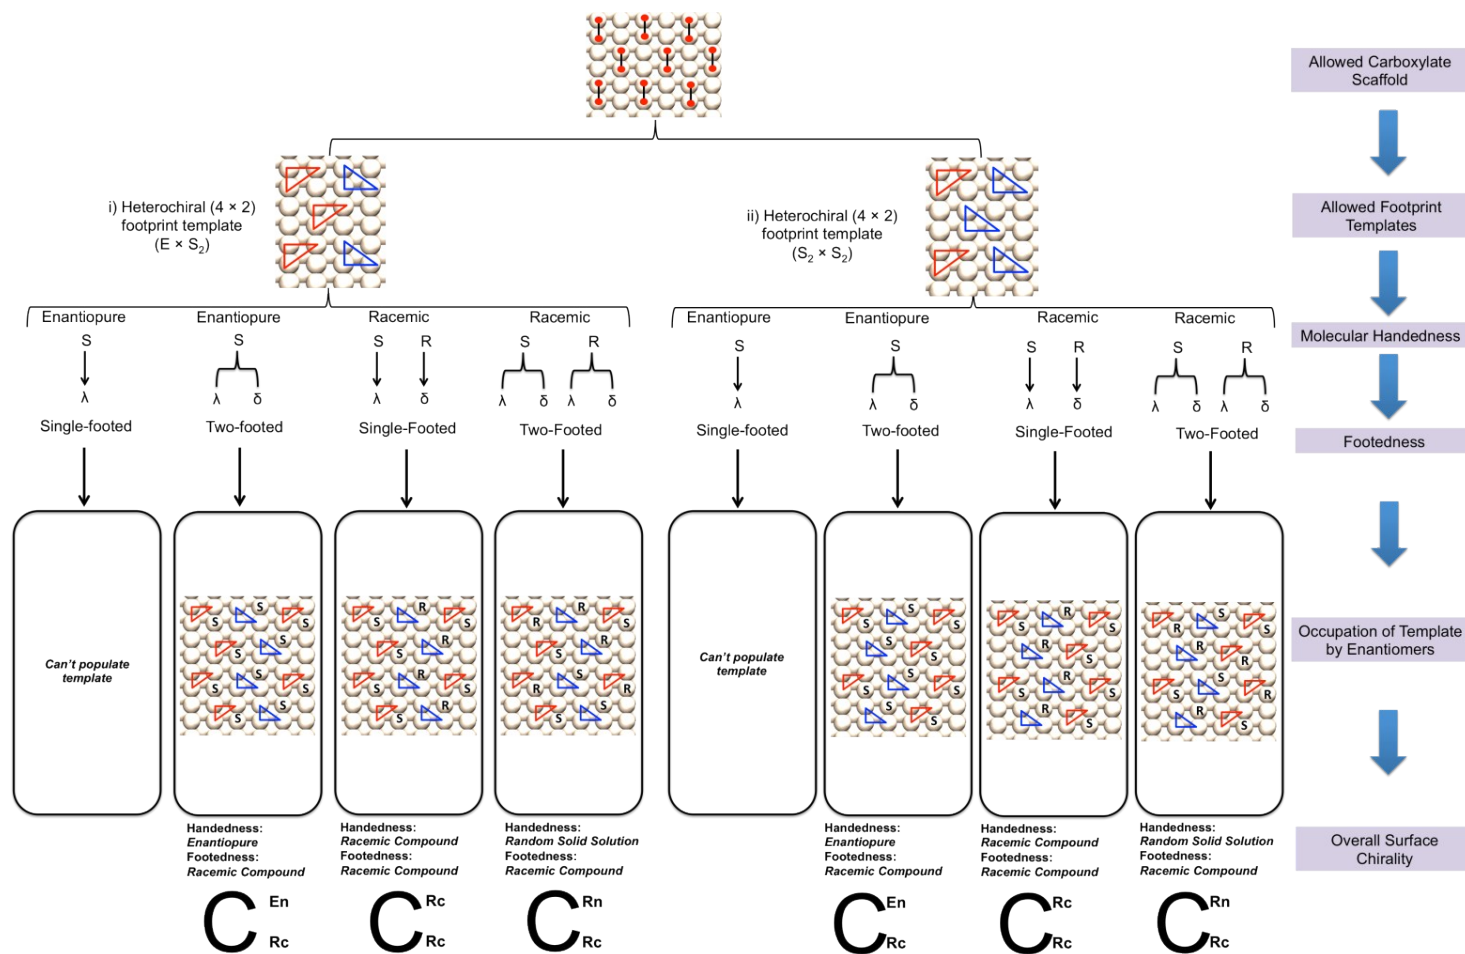

**Figure S4** Surface chirality generators for the (i) heterochiral ( $E \times S_2$ ) and (ii) heterochiral ( $S_2 \times S_2$ ) footprint templates within a ( $4 \times 2$ ) packing. The chiral outputs arising from the enantiopure and racemic adsorption of both single-footed and two-footed molecules are derived for each template and are labelled in terms of their overall surface chirality,  $C_F^H$ .

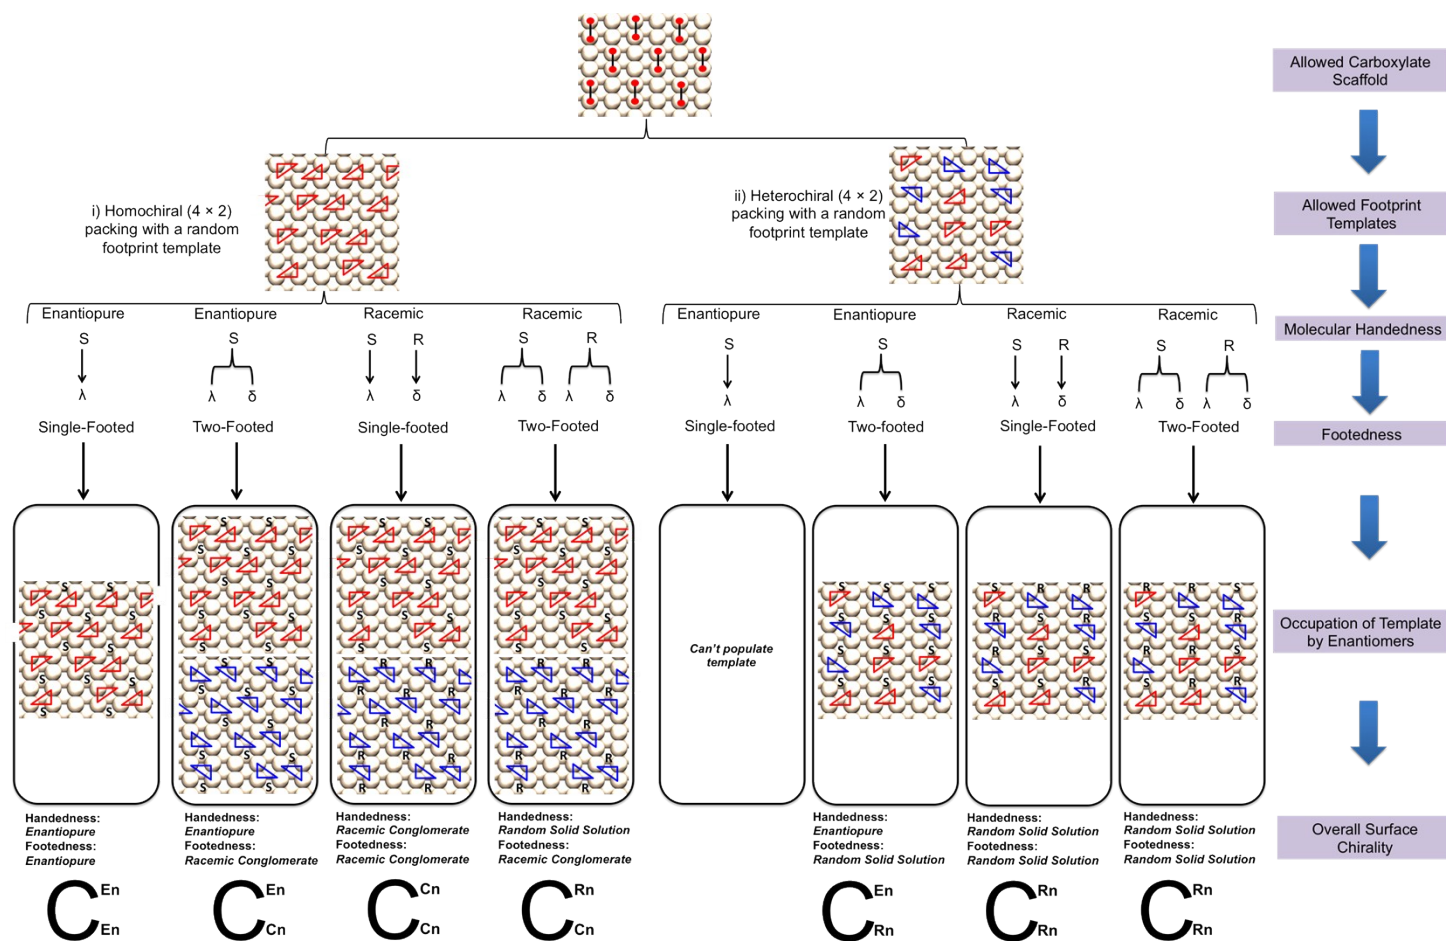

**Figure S5** Surface chirality generators for (i) homochiral and (ii) heterochiral randomized footprint templates within a  $(4 \times 2)$  packing. The chiral outputs arising from the enantiopure and racemic adsorption of both single-footed and two-footed molecules are derived for each template and are labelled in terms of their overall surface chirality,  $C_F^H$ .

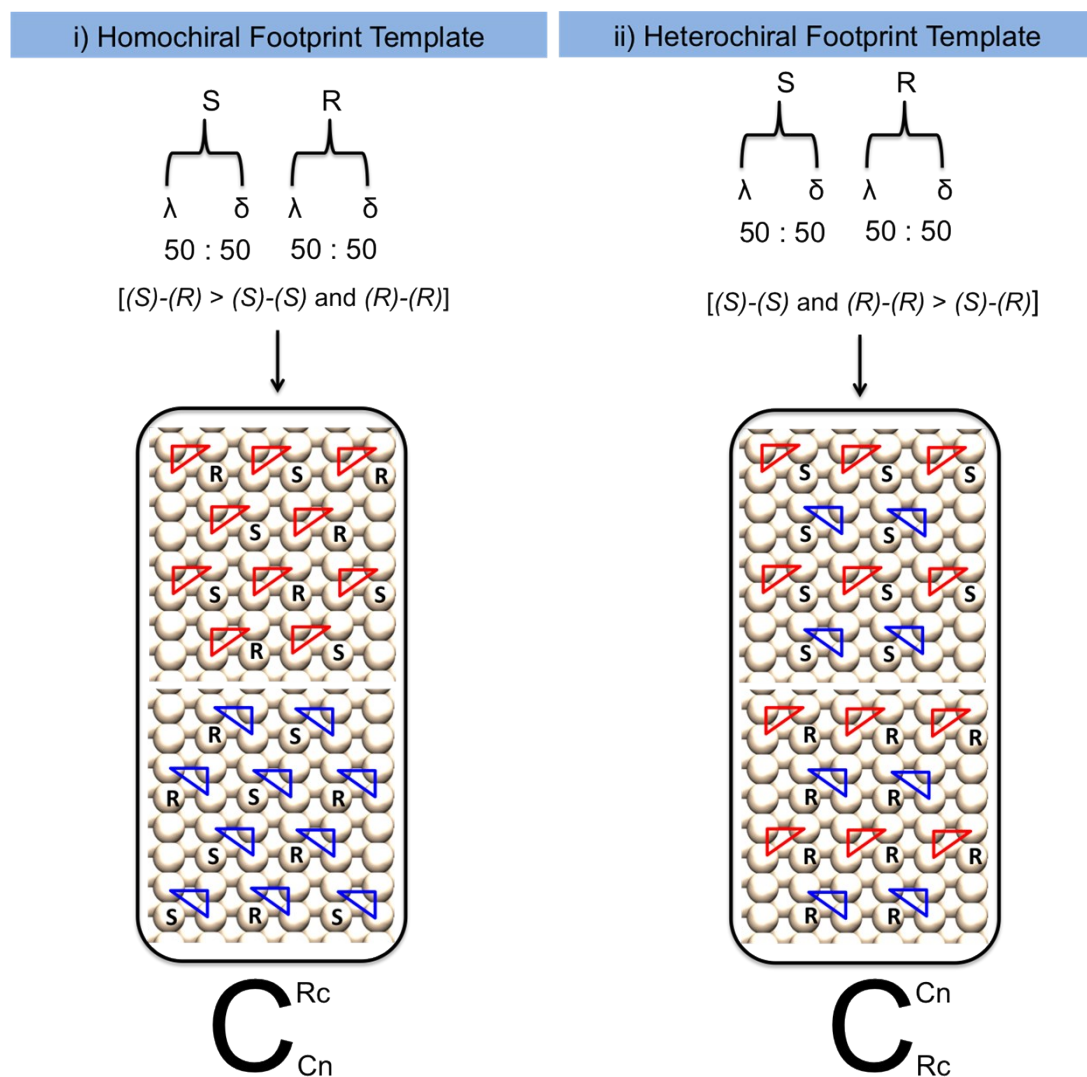

**Figure S6.** Examples of chiral surfaces that may arise from either a statistically rare event or tailored enantiospecific interactions within (i) a homochiral footprint template and (ii) a heterochiral footprint template. (i) For racemic adsorption of a two-footed molecule in a homochiral template, we would expect a random arrangement of enantiomers if (*S*) and (*R*) can occupy  $\lambda$  and  $\delta$  footprints equally, leading to a surface described by,  $C_{Cn}^{Rn}$  (see surface chirality generators above). However, consider an event in which, by chance, enantiomers order as a racemic compound. The resulting surface would be a conglomerate in terms of the footprints but a racemic compound at the handedness level,  $C_{Cn}^{Rc}$ . This outcome is not disallowed by the rules but could only arise from a statistically rare event. Alternatively, enantiospecific interactions could be tailored such that heterochiral enantiomer interactions (*R*)-(S) are favoured over the homochiral interactions. In this instance, the chiral surface described by  $C_{Cn}^{Rc}$  could arise. (ii) Similarly, for racemic adsorption of a two-footed molecule in a heterochiral footprint template we would expect a random arrangement of enantiomers,  $C_{Rc}^{Rn}$  (see surface chirality generators above). However, a statistically rare event could also lead to a conglomerate at the handed level,  $C_{Rc}^{Cn}$  should enantiomers organize in separate domains. Again, this is a statistically unlikely event, but it is not forbidden by the rules. Alternatively, a conglomerate within the heterochiral footprint template,  $C_{Rc}^{Cn}$  could arise if interactions between homochiral enantiomer pairs (*S*)-(S) and (*R*)-(R) are preferred over heterochiral ones (*R*)-(S).
